# Supplementary material
Source: Springer Nature journal article supplement (https://www.springermedizin.de/resource/supplementary/12911_2012_510_MOESM6_ESM.pdf/9526050)

## Which key parameters are missed and how often?

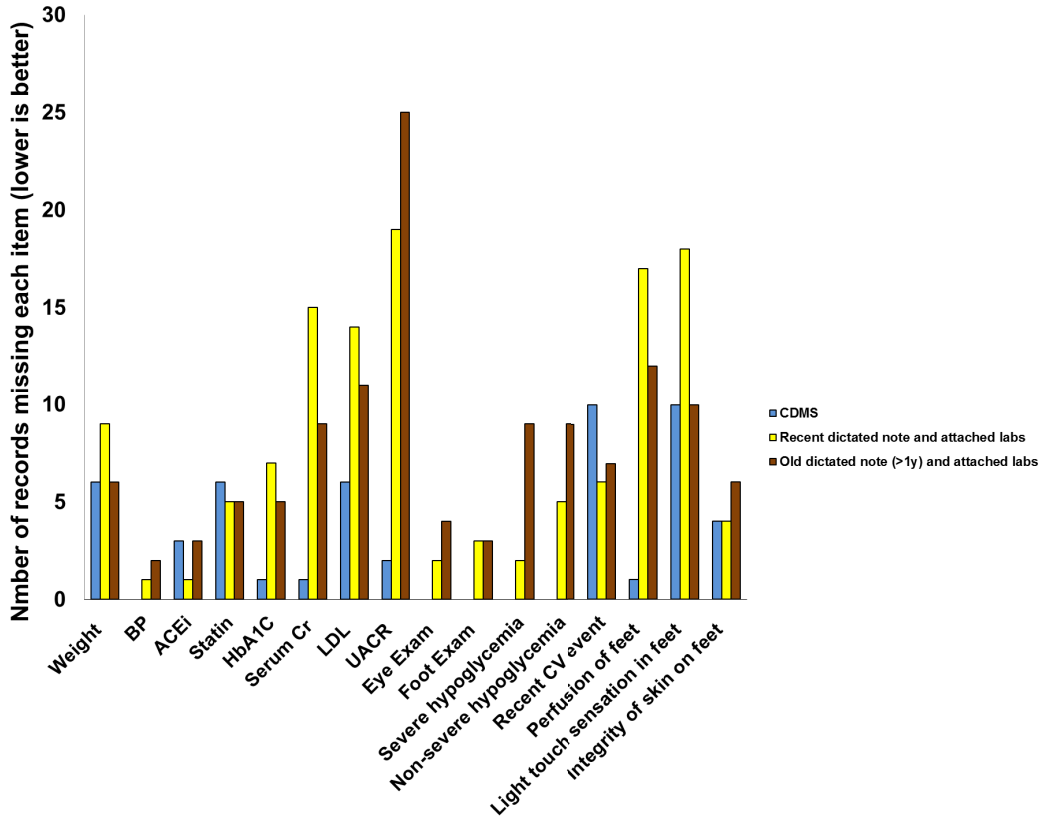

## Which key parameters are missed and how often?



Supplement: MOESM6 [file 9526050]
